# Supplementary material for: The root of anomalously specular reflections from solid surfaces on Saturn’s moon Titan
Source: Nat Commun. 2020 Jun 16;11:2829. doi: 10.1038/s41467-020-16663-1 (PMC7298017; doi:10.1038/s41467-020-16663-1)
Supplement: Supplementary file 3 — Supplementary Data 1 [file 41467_2020_16663_MOESM3_ESM.xlsx]

## Sheet: AO_Subradar
Supplementary Table 1: Subradar locations of Arecibo Observatory observations using the 2015 International Astronomical Union's spin model (Archinal et al., 2018). See Black et al., 2011 for additional observational parameters.
Start (YYYY MM DD HH MM SS UTC)	End (YYYY MM DD HH MM SS UTC)	Start W. Lon.	Start Lat.	Middle W. Lon.	Middle Lat.	End W. Lon.	End Lat.
2000 11 03 06 17 47	2000 11 03 06 47 20	162.916	-23.8958	163.149	-23.8957	163.381	-23.8956
2000 11 04 06 13 40	2000 11 04 06 42 50	185.535	-23.8826	185.764	-23.8825	185.994	-23.8823
2000 11 05 06 10 21	2000 11 05 06 38 30	208.166	-23.8659	208.387	-23.8657	208.609	-23.8655
2000 11 06 06 04 39	2000 11 06 06 34 00	230.755	-23.8459	230.986	-23.8457	231.217	-23.8455
2000 11 07 06 00 21	2000 11 07 06 29 50	253.36	-23.8235	253.592	-23.8233	253.824	-23.823
2000 11 08 05 56 05	2000 11 08 06 25 50	275.955	-23.8001	276.189	-23.7999	276.423	-23.7996
2000 11 09 05 51 53	2000 11 09 06 21 20	298.542	-23.7772	298.774	-23.7769	299.006	-23.7767
2000 11 27 04 49 09	2000 11 27 05 04 40	345.464	-23.5088	345.586	-23.5087	345.708	-23.5086
2001 11 25 05 45 36	2001 11 25 06 16 38	245.227	-25.9563	245.472	-25.9561	245.716	-25.956
2001 11 26 05 41 18	2001 11 26 06 12 21	267.831	-25.942	268.076	-25.9419	268.32	-25.9417
2001 11 27 05 40 07	2001 11 27 06 08 06	290.474	-25.9277	290.694	-25.9276	290.914	-25.9275
2001 11 28 05 32 52	2001 11 28 06 03 54	313.013	-25.9152	313.257	-25.915	313.501	-25.9149
2001 11 29 05 28 41	2001 11 29 05 58 20	335.593	-25.9055	335.826	-25.9054	336.059	-25.9053
2001 11 30 05 24 29	2001 11 30 05 55 32	358.169	-25.8995	358.414	-25.8995	358.658	-25.8994
2001 12 01 05 20 18	2001 12 01 05 51 21	20.7474	-25.8973	20.9915	-25.8973	21.2357	-25.8973
2001 12 02 05 16 39	2001 12 02 05 47 09	43.338	-25.8984	43.5779	-25.8985	43.8179	-25.8985
2001 12 03 05 12 17	2001 12 03 05 42 55	65.9245	-25.9021	66.1656	-25.9022	66.4066	-25.9022
2001 12 06 04 59 15	2001 12 06 05 30 01	133.739	-25.9157	133.981	-25.9157	134.223	-25.9157
2001 12 07 04 54 23	2001 12 07 05 25 40	156.351	-25.9168	156.597	-25.9168	156.844	-25.9168
2001 12 08 04 50 43	2001 12 08 05 21 18	178.985	-25.9145	179.226	-25.9144	179.467	-25.9144
2001 12 09 04 46 21	2001 12 09 05 16 56	201.609	-25.9083	201.85	-25.9082	202.091	-25.9081
2001 12 10 04 41 24	2001 12 10 05 12 34	224.219	-25.8985	224.464	-25.8984	224.71	-25.8983
2001 12 20 04 00 32	2001 12 20 04 30 24	90.1055	-25.842	90.3405	-25.842	90.5756	-25.8421
2001 12 21 03 57 29	2001 12 21 04 26 06	112.723	-25.8476	112.949	-25.8476	113.174	-25.8477
2002 01 11 02 29 56	2002 01 11 02 57 31	227.029	-25.8024	227.246	-25.8023	227.463	-25.8022
2002 11 23 07 21 07	2002 11 23 07 37 40	144.981	-26.4228	145.112	-26.4229	145.242	-26.423
2002 12 16 05 21 52	2002 12 16 05 52 10	304.459	-26.5281	304.698	-26.528	304.936	-26.528
2002 12 22 04 59 04	2002 12 22 05 26 50	79.9979	-26.5785	80.2165	-26.5786	80.435	-26.5788
2002 12 23 04 52 30	2002 12 23 05 22 30	102.564	-26.5946	102.8	-26.5947	103.037	-26.5949
2002 12 24 04 47 55	2002 12 24 05 18 10	125.171	-26.6099	125.409	-26.61	125.647	-26.6102
2002 12 27 04 35 17	2002 12 27 05 05 00	193.041	-26.6386	193.275	-26.6386	193.509	-26.6386
2002 12 28 04 31 01	2002 12 28 05 00 40	215.663	-26.6404	215.897	-26.6404	216.13	-26.6404
2002 12 29 04 26 15	2002 12 29 04 56 15	238.271	-26.6388	238.507	-26.6388	238.743	-26.6388
2002 12 30 04 22 02	2002 12 30 04 51 50	260.877	-26.6351	261.111	-26.6351	261.346	-26.635
2004 01 02 05 16 05	2004 01 02 05 45 50	273.327	-25.49	273.561	-25.49	273.795	-25.4901
2004 01 03 05 11 53	2004 01 03 05 41 30	295.919	-25.4973	296.152	-25.4974	296.385	-25.4975
2004 01 04 05 07 43	2004 01 04 05 37 20	318.503	-25.5066	318.736	-25.5067	318.968	-25.5068
2004 01 05 05 03 35	2004 01 05 05 35 10	341.081	-25.5188	341.329	-25.519	341.578	-25.5191
2004 01 09 04 49 16	2004 01 09 05 16 10	71.4393	-25.601	71.6509	-25.6012	71.8626	-25.6015
2004 01 10 04 42 41	2004 01 10 05 11 50	93.9978	-25.6265	94.2272	-25.6268	94.4567	-25.6271
2004 01 11 04 43 00	2004 01 11 05 07 50	116.674	-25.6519	116.869	-25.6521	117.065	-25.6523
2004 01 12 04 34 05	2004 01 12 05 03 20	139.213	-25.6754	139.443	-25.6756	139.673	-25.6758
2005 01 10 05 45 13	2005 01 10 06 15 43	61.8204	-22.6672	62.0603	-22.6676	62.3002	-22.6679
2005 01 11 05 40 05	2005 01 11 06 10 35	84.3952	-22.701	84.6352	-22.7013	84.8752	-22.7017
2005 01 12 05 36 33	2005 01 12 06 06 13	107.005	-22.7351	107.238	-22.7355	107.472	-22.7358
2005 01 13 05 31 22	2005 01 13 06 02 02	129.597	-22.7683	129.839	-22.7687	130.08	-22.769
2005 01 19 05 23 11	2005 01 19 05 37 11	265.55	-22.9077	265.66	-22.9077	265.77	-22.9078
2005 01 21 04 57 53	2005 01 21 05 27 23	310.455	-22.9413	310.687	-22.9415	310.919	-22.9417
2005 01 28 04 29 27	2005 01 28 04 56 27	108.517	-23.1337	108.729	-23.134	108.942	-23.1343
2005 01 29 04 24 42	2005 01 29 04 52 02	131.111	-23.1647	131.326	-23.165	131.542	-23.1653
2006 01 12 06 41 07	2006 01 12 07 10 27	53.2116	-18.2409	53.4422	-18.2413	53.6728	-18.2416
2006 01 13 06 36 47	2006 01 13 07 06 17	75.7856	-18.2779	76.0176	-18.2783	76.2496	-18.2787
2006 01 14 06 32 24	2006 01 14 07 01 54	98.3681	-18.3158	98.6002	-18.3162	98.8323	-18.3166
2006 01 15 06 28 00	2006 01 15 07 06 17	120.96	-18.3537	121.261	-18.3542	121.563	-18.3547
2006 01 24 05 49 10	2006 01 24 06 19 20	324.327	-18.6162	324.564	-18.6165	324.801	-18.6168
2006 01 25 05 44 59	2006 01 25 06 14 59	346.895	-18.6458	347.131	-18.6461	347.367	-18.6464
2006 01 26 05 40 48	2006 01 26 06 10 58	9.46303	-18.678	9.70013	-18.6783	9.93723	-18.6787
2006 01 27 05 36 36	2006 01 27 06 06 46	32.0325	-18.7127	32.2696	-18.7131	32.5068	-18.7135
2006 02 01 05 15 56	2006 02 01 05 45 46	144.992	-18.903	145.227	-18.9033	145.462	-18.9037
2006 02 03 05 06 25	2006 02 03 05 36 45	190.201	-18.9691	190.44	-18.9694	190.679	-18.9698
2007 01 19 07 15 39	2007 01 19 07 39 23	158.636	-12.9941	158.823	-12.9943	159.009	-12.9946
2007 01 20 07 11 13	2007 01 20 07 35 44	181.231	-13.0278	181.424	-13.0281	181.617	-13.0283
2007 01 25 07 01 04	2007 01 25 07 14 00	294.34	-13.1789	294.441	-13.179	294.543	-13.1791
2007 01 28 06 36 53	2007 01 28 07 06 53	1.84462	-13.2763	2.08032	-13.2766	2.31603	-13.277
2007 01 29 06 32 38	2007 01 29 06 57 34	24.4047	-13.3128	24.6006	-13.3131	24.7966	-13.3134
2007 01 30 06 28 22	2007 01 30 06 53 26	46.9689	-13.3512	47.1659	-13.3515	47.3629	-13.3519
2007 02 01 06 19 40	2007 02 01 06 45 04	92.1169	-13.432	92.3167	-13.4323	92.5165	-13.4327
2007 02 02 06 15 18	2007 02 02 06 40 50	114.704	-13.473	114.905	-13.4734	115.106	-13.4737
2007 02 03 06 10 54	2007 02 03 06 36 32	137.3	-13.5134	137.502	-13.5137	137.703	-13.5141
2007 02 04 06 06 28	2007 02 04 06 36 00	159.901	-13.5524	160.134	-13.5527	160.366	-13.5531
2007 02 05 06 02 04	2007 02 05 06 32 00	182.507	-13.5894	182.742	-13.5898	182.978	-13.5902
2007 02 17 05 11 16	2007 02 17 05 37 26	93.4648	-14.0101	93.6706	-14.0104	93.8765	-14.0108
2008 02 09 06 50 42	2008 02 09 07 03 42	220.999	-7.65829	221.101	-7.65845	221.204	-7.6586
2008 02 10 06 46 11	2008 02 10 06 59 11	243.585	-7.69294	243.687	-7.6931	243.789	-7.69326
2008 02 11 06 41 54	2008 02 11 06 54 54	266.166	-7.72733	266.268	-7.72749	266.371	-7.72765
2008 02 12 06 37 36	2008 02 12 06 50 36	288.739	-7.76188	288.842	-7.76204	288.944	-7.76219
2008 02 13 06 33 22	2008 02 13 06 46 22	311.306	-7.79699	311.408	-7.79715	311.511	-7.79731
2008 02 19 06 09 37	2008 02 19 06 22 37	86.7193	-8.02977	86.8215	-8.02996	86.9238	-8.03015
2008 02 21 05 59 34	2008 02 21 06 12 34	131.873	-8.11216	131.976	-8.11235	132.078	-8.11253
2008 02 22 05 55 39	2008 02 22 06 08 39	154.479	-8.15246	154.581	-8.15264	154.684	-8.15282
2008 02 23 05 50 19	2008 02 23 06 03 19	177.066	-8.19157	177.169	-8.19174	177.271	-8.19191

## Sheet: Cassini_Dates
Supplementary Table 2: Dates of Cassini RADAR Images and Altimetry Observations of Titan
Titan Flyby	Date (YYYY MM DD)
ta	2004 10 27
t3	2005 02 15
t4	2005 03 31
t7	2005 09 07
t8	2005 10 28
t13	2006 04 30
t15	2006 07 02
t16	2006 07 26
t17	2006 09 07
t18	2006 09 23
t19	2006 10 09
t20	2006 10 25
t21	2006 12 12
t23	2007 01 13
t25	2007 02 22
t28	2007 04 10
t29	2007 04 26
t30	2007 05 12
t36	2007 10 01
t39	2007 12 20
t41	2008 02 22
t43	2008 05 12
t44	2008 05 28
t48	2008 12 05
t49	2008 12 21
t50	2009 02 07
t55	2009 05 21
t56	2009 06 06
t57	2009 06 22
t58	2009 07 08
t59	2009 07 24
t61	2009 08 25
t63	2009 12 11
t64	2009 12 27
t65	2010 01 12
t69	2010 06 05
t71	2010 07 07
t77	2011 06 20
t83	2012 05 21
t84	2012 06 06
t86	2012 09 26
t91	2013 05 23
t92	2013 07 10
t95	2013 10 13
t98	2014 02 02
t104	2014 08 21
t108	2015 01 11
t113	2015 09 28
t120	2016 06 07
t121	2016 07 25
t126	2017 04 22
